# Supplementary material
Source: bioRxiv or medRxiv preprint supplement (https://www.biorxiv.org/content/biorxiv/early/2019/03/05/568147/DC7/embed/media-7.pdf)
Supplement: Supplementary file [file media-7.pdf]

| Code    | Sex | Age | HCC (Y/N) | Chronic/Acute Infection | Cirrhosis (Y/N) | HDV coinfectd (Y/N) | HBV DNA (Y/N) | Treatment (Y/N) | HBsAg (P/N) | HBcAg (P/N) | HBeAg (P/N) | anti HBsAg | anti HBcAg | anti HBeAg | DNA  |
|---------|-----|-----|-----------|-------------------------|-----------------|---------------------|---------------|-----------------|-------------|-------------|-------------|------------|------------|------------|------|
| iP-B    | F   | 44  | N         | NA                      | N               | N                   | N             | N               | N           | NA          | NA          | P          | NA         | NA         | NA   |
| iP-BC   | M   | 49  | N         | Chronic                 | Y               | N                   | N             | Y               | P           | NA          | NA          | P          | P          | NA         | <20  |
| iP-BCC1 | M   | 65  | Y         | Chronic                 | Y               | N                   | N             | Y               | P           | NA          | NA          | N          | P          | NA         | NA   |
| iP-BCC2 | M   | 54  | Y         | Chronic                 | Y               | N                   | N             | Y               | P           | NA          | NA          | N          | P          | NA         | <20  |
| iP-BCC3 | M   | 68  | Y         | Chronic                 | Y               | N                   | N             | Y               | P           | NA          | NA          | N          | P          | NA         | <20  |
| iP-BCC4 | M   | 52  | Y         | Chronic                 | Y               | N                   | N             | Y               | P           | NA          | N           | N          | P          | P          | <20  |
| iP-BF   | F   | 54  | N         | Chronic                 | N               | N                   | N             | N               | P           | NA          | N           | N          | P          | P          | <20  |
| iP-BFA  | M   | 62  | N         | Acute                   | N               | N                   | N             | N               | P           | NA          | NA          | P          | P          | NA         | NA   |
| iP-BDF1 | M   | 28  | N         | Chronic                 | N               | Y                   | Y             | N               | P           | NA          | N           | NA         | P          | P          | 1180 |
| iP-BDF2 | F   | 60  | N         | Chronic                 | N               | Y                   | Y             | Y               | P           | NA          | NA          | N          | P          | NA         | 1080 |
| iP-BDC  | M   | 59  | Y         | Chronic                 | Y               | Y                   | N             | Y               | P           | NA          | NA          | N          | P          | P          | <20  |
